# Supplementary material for: From multi-ring to spider web and radial spoke: competition between the receding contact line and particle deposition in a drying colloidal drop
Source: Royal Society of Chemistry journal article supplement (doi:10.1039/c4sm00497c), 2014-01-01
Supplement: c4sm00497c1.pdf [file c4sm00497c1.pdf]

## Supplementary Information

### A1. Contact line receding velocity of an evaporating drop

In colloidal drop drying processes, multi-ring depositions are formed due to the stick-slip motion of the contact line when it recedes as shown in Fig. 1. This stick-slip motion can be described as a step function in the drop radius,  $R$ , vs evaporation time,  $t$ , plot (Fig. A1b). However, it is difficult to quantify the contact line velocity during each stick-slip motion, due to the repetitive acceleration and deceleration nature of the processes. Instead, we assume the contact line undergoes a continuous motion during receding, as shown in the dashed line of Fig. A1b, in order to correlate the contact line velocity with  $R$ .

For an inkjet-printed pico-liter drop ( $Bo < 0.005$ ), where the effect of gravity can be neglected, the drop shape is considered as a spherical cap with contact angle  $\theta$  and radius  $R$  shown in Fig. A1. When  $t = t_0$ , the volume of the drop can be written as

$$V(t_0) = \frac{1}{6} \pi R^3(t_0) \tan \frac{1}{2} \theta(t_0) [3 + \tan^2 \frac{1}{2} \theta(t_0)] \quad (\text{A1})$$

On very hydrophilic substrates, the contact angle of the drop during receding approaches zero and it follows  $\tan^2[\theta(t_0)/2] \ll 3$ . Hence, the volume of the drop at  $t = t_0$  can be simplified as

$$V(t_0) = \frac{1}{2} \pi R^3(t_0) \tan \frac{1}{2} \theta(t_0) \quad \text{for small } \theta \quad (\text{A2})$$

Similarly, the volume of the drop at  $t = t_0 + \delta t$  is given by

$$V(t_0 + \delta t) = \frac{1}{2} \pi R^3(t_0 + \delta t) \tan \frac{1}{2} \theta(t_0 + \delta t) \quad \text{for small } \theta \quad (\text{A3})$$

Utilizing Eqs. (A2) and (A3), it follows

$$\frac{dV(t_0)}{dt} = \lim_{\delta t \rightarrow 0} \frac{V(t_0 + \delta t) - V(t_0)}{\delta t} = \frac{1}{2} \pi \left[ \frac{\frac{d\theta(t_0)}{dt}}{2 \cos^2 \frac{1}{2} \theta(t_0)} R^3(t_0) + 3R^2(t_0) \frac{dR(t_0)}{dt} \tan \frac{1}{2} \theta(t_0) \right] \quad (\text{A4})$$

For an incompressible drop,  $dm = \rho dV$ , where  $m$  and  $\rho$  are mass and density of a drop. Hence, the drop contact line velocity at  $t = t_0$  is given by reorganizing Eq. (A4)

$$\frac{dR}{dt} = \frac{1}{3R^2 \tan \frac{1}{2} \theta} \left( \frac{2}{\rho \pi} \frac{dm}{dt} - \frac{0.5 \frac{d\theta}{dt}}{\cos \frac{1}{2} \theta} R^3 \right) \quad (\text{A5})$$

For a very hydrophilic substrate, where the equilibrium contact angle of the drop is very small, the contact angle variation during drop receding is considered to be small, i.e.,  $\frac{d\theta}{dt} \sim 0$ , which follows

$$\frac{dR}{dt} = \frac{2}{3\rho\pi R^2 \tan \frac{1}{2} \theta} \left( \frac{dm}{dt} \right) \quad (\text{A6})$$

The volume variation of the drop due to solvent evaporation,  $dm/dt$ , can be obtained by integrating the diffusion driven evaporation along the drop surface to yield<sup>1</sup>

$$\frac{dm}{dt} = -1.3\pi RD(1 - \text{RH})c_v \quad (\text{A7})$$

where  $D$  is the diffusivity of water vapor in air, RH is the ambient relative humidity, and  $c_v$  is the saturated vapor concentration of the solvent.

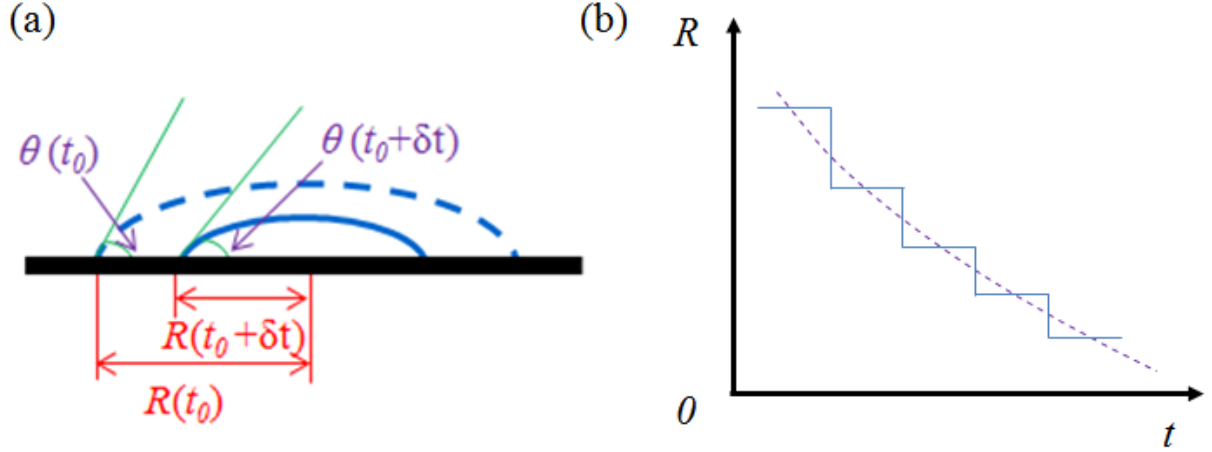

Figure A1: (a) Schematic illustration of a drop receding on a hydrophilic substrate. (b) Schematic step function of stick-slip motion of the contact line (solid lines) and the fitted linear curve (dash line) during drop receding. The dash line follows  $R \sim \sqrt{t}$  by integrating Eq. (A9).

Substituting Eq. (A7) into Eq. (A6), the instantaneous contact line velocity is given by

$$U_{\text{CL}} = \frac{dR}{dt} = -\frac{1.3c_v D(1-\text{RH})}{3\rho_l \tan \frac{1}{2}\theta} \frac{1}{R} \quad (\text{A8})$$

Because the change in contact angle is trivial during drop receding on a very hydrophilic substrate,  $\tan[\theta(t)/2]$  can be approximated as a constant and hence the contact line velocity inside a drying drop gives

$$U_{\text{CL}} \sim 1/R \quad (\text{A9})$$

which implies that the contact line velocity keeps increasing during drop receding.

## A2. Particle deposition rate at contact line

Based on Eq. (A7), the volumetric solvent evaporation rate of the entire drop is

$$\frac{dV}{dt} = -\frac{1.3\pi RD(1-RH)c_v}{\rho_l} \quad (\text{A10})$$

Because particles are accumulated and deposited along the drop edge, the volumetric particle deposition rate along the contact line gives  $2\pi RndU_p$  or  $C_p(dV/dt)/(1-\varepsilon)$ , where  $d$  is the particle diameter,  $C_p$  the particle volume fraction,  $\varepsilon$  the deposition porosity, and  $n$  the number of layers of particles in the deposition. The radial growth rate of particle deposition,  $U_p$ , can hence be given by

$$U_p = -\frac{1.3D(1-RH)c_v}{2dn\rho_l(1-\varepsilon)}C_p \quad (\text{A11})$$

Experimental evidence shows that the particle concentration in the central region of the drop does not change during drying<sup>2</sup>. Here, we assume that the particle concentration, layer of the particles, and porosity in the deposition do not change during evaporation, and hence the radial growth rate of particle deposition,  $U_p$ , is a constant during drop receding and is independent of the contact line radius,  $R$ , following

$$U_p \sim \text{const} \quad (\text{A12})$$

### A3. Ring spacing of the multi-ring structure

During drop receding, when the contact angle decreases below a critical value, the depinning forces surpass the pinning forces driving the contact line to depin from the original location  $(R, \theta)$  and slip to a new location  $(R-\delta R, \theta+\delta\theta)$ , where the contact line pins again and forms a new ring at  $R-\delta R$ , as shown in Fig A2. Here,  $\delta R$  is the ring spacing at location  $R$ .

Assuming the drop is of spherical-cap shape both before and after slip and solvent evaporation is minimal during slip<sup>3</sup>, the volume of the drop can be written as

$$V = \frac{1}{2} \pi R^3 \tan \frac{1}{2} \theta \quad (\text{A13})$$

or

$$V = \frac{1}{2} \pi (R - \delta R)^3 \tan \frac{1}{2} (\theta + \delta \theta) \quad (\text{A14})$$

Hence, the ring spacing,  $\delta R$ , can be expressed as a function of the instantaneous drop radius,  $R$ , as

$$\delta R = CR \quad (\text{A15})$$

where  $C = \left(1 - \sqrt[3]{\frac{\tan \frac{1}{2} \theta - \tan^2 \frac{1}{2} \theta \cdot \tan \frac{1}{2} \delta \theta - \tan^3 \frac{1}{2} \theta}{\tan \frac{1}{2} \delta \theta + \tan \frac{1}{2} \theta}}\right)$ . Assuming  $\theta$  and  $\theta + \delta \theta$  keep constant at

different ring positions<sup>3-5</sup>, the coefficient  $C$  becomes a constant during drop evaporation. Hence, it follows

$$\delta R \sim R \quad (\text{A16})$$

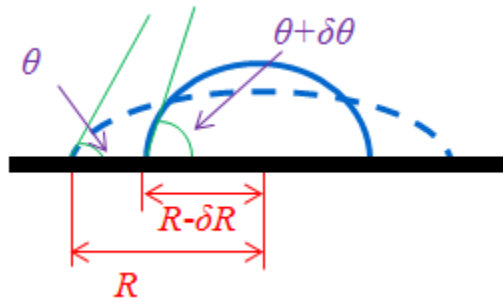

Figure A2: Schematic illustration of the stick-slip motion of the contact line.

#### A4. Scanning Electron Microscopy (SEM) images of deposition morphologies for colloidal drops with different particle loadings

Deposition morphologies of evaporating colloidal drops dried at 40% relative humidity with 20nm particles at particle loadings of 0.5%, 0.25%, and 0.1% are shown in Figs. A3, A4, and A5, respectively.

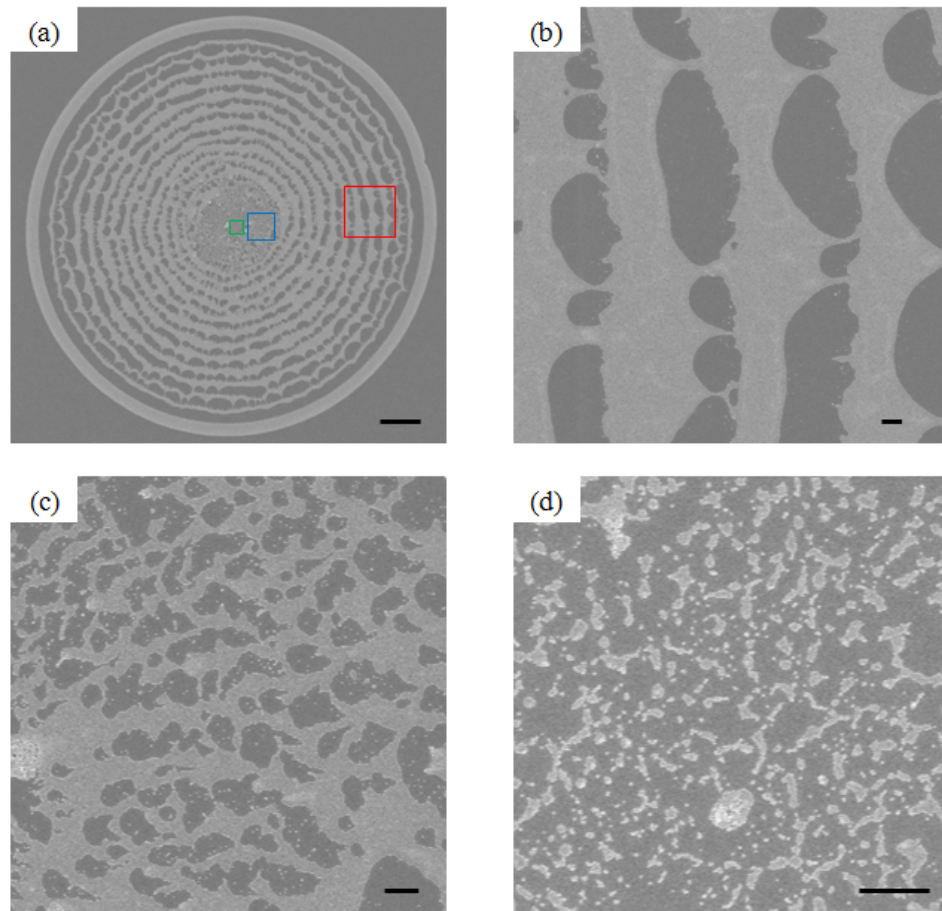

Figure A3: Deposition morphologies inside colloidal drops dried at 40% relative humidity with 20 nm particles at 0.5 % particle loading. (a) Overview morphology, (b) – (d) high magnification SEM images of: (b) the multi-ring in red box, (c) the foam in blue box, (d) the island in green box. The scale bars are 20  $\mu\text{m}$  in (a) and 1  $\mu\text{m}$  in (b) – (d).

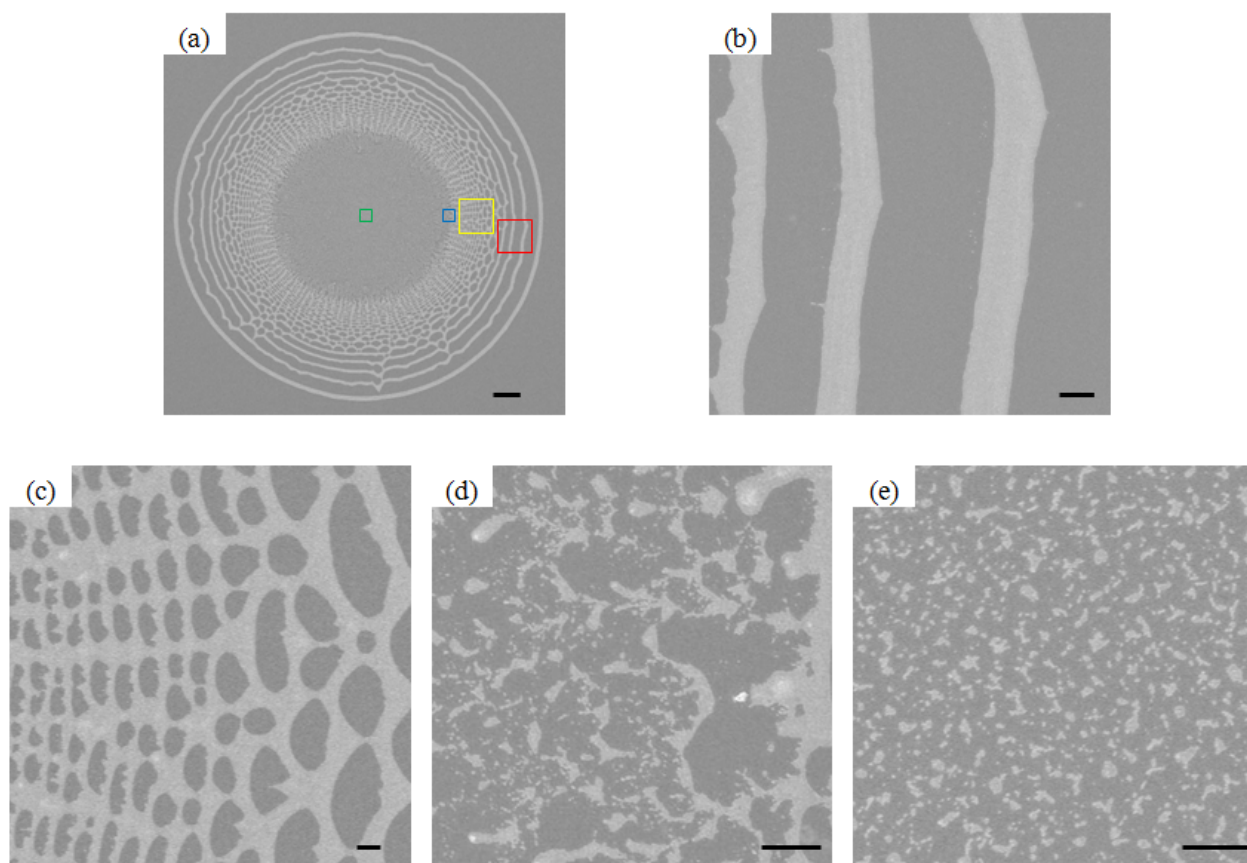

Figure A4: Deposition morphologies inside colloidal drops dried at 40% relative humidity with 20 nm particles at 0.25 % particle loading. (a) Overview morphology, (b) – (e) high magnification SEM images of: (b) the multi-ring in red box, (c) the spider web in yellow box, (d) the foam in blue box, (e) the island in the green box. The scale bars are 20  $\mu\text{m}$  in (a) and 2  $\mu\text{m}$  in (b) – (e).

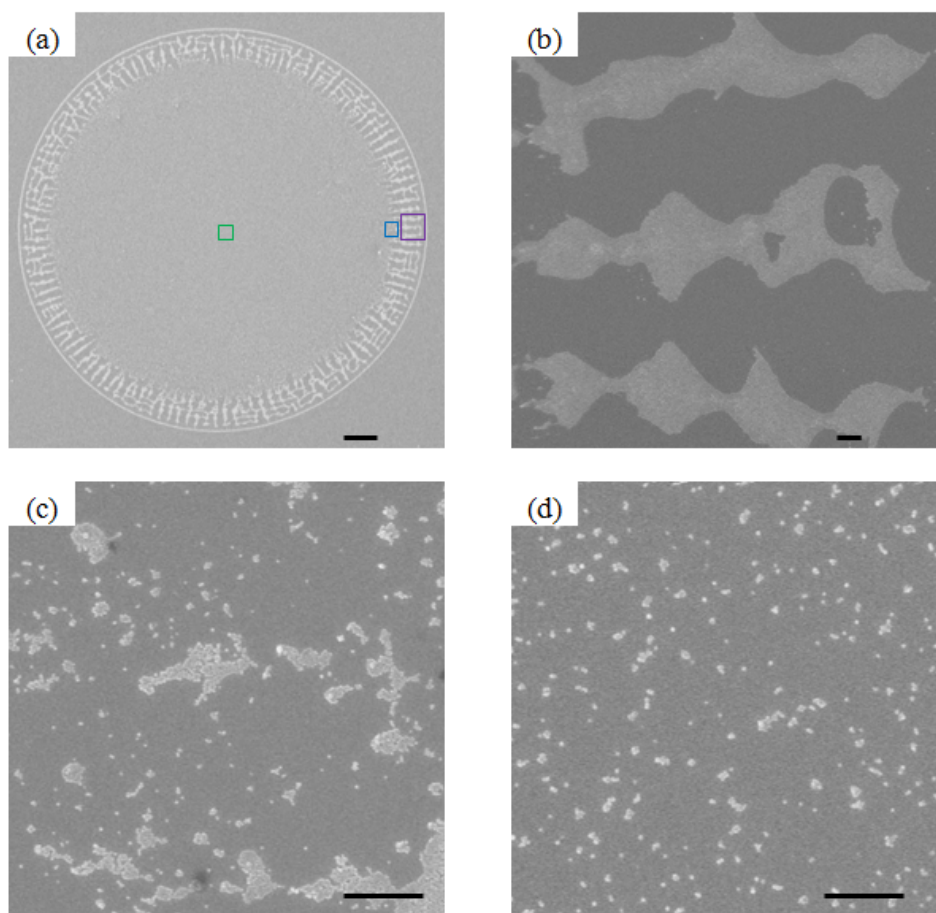

Figure A5: Deposition morphologies inside colloidal drops dried at 40% relative humidity with 20 nm particles at 0.1 % particle loading. (a) Overview morphology, (b) – (d) high magnification SEM images of: (b) the spoke in purple box, (c) the foam in blue box, (d) the island in the green box. The scale bars are 20  $\mu\text{m}$  in (a) and 1  $\mu\text{m}$  in (b) – (e).

## REFERENCE

1. Hu, H.; Larson, R. G., Evaporation of a sessile droplet on a substrate. *Journal of Physical Chemistry B* **2002**, 106, (6), 1334-1344.



2. Kajiya, T.; Kaneko, D.; Doi, M., Dynamical Visualization of "Coffee Stain Phenomenon" in Droplets of Polymer Solution via Fluorescent Microscopy. *Langmuir* **2008**, 24, (21), 12369-12374.
3. Xu, J.; Xia, J. F.; Hong, S. W.; Lin, Z. Q.; Qiu, F.; Yang, Y. L., Self-assembly of gradient concentric rings via solvent evaporation from a capillary bridge. *Physical Review Letters* **2006**, 96, (6).
4. Tadmor, R., Line energy, line tension and drop size. *Surface Science* **2008**, 602, (14), L108-L111.
5. Maheshwari, S.; Zhang, L.; Zhu, Y. X.; Chang, H. C., Coupling between precipitation and contact-line dynamics: Multiring stains and stick-slip motion. *Physical Review Letters* **2008**, 100, (4).
